# Supplementary material
Source: MDPI journal article supplement (https://www.mdpi.com/2311-5637/10/7/368)
Supplement: s1 [file s1=3fversion=3d1721375173]

**Table S1.** Tentative identification of the chemical constituents of Rosa by UHPLC-Q-q-Q-MS/MS under negative and positive ionization

| Compound                  | Formula                                           | MS/MS transition (MRM) |                      | Fragmentor<br>(V) | Collision<br>energy<br>(V) | Polarity |
|---------------------------|---------------------------------------------------|------------------------|----------------------|-------------------|----------------------------|----------|
|                           |                                                   | Precursor ion<br>(m/z) | Product ion<br>(m/z) |                   |                            |          |
| Epicatechin               | C <sub>15</sub> H <sub>14</sub> O <sub>6</sub>    | 289                    | 245                  | 200               | 22                         | Negative |
| Catechin                  | C <sub>15</sub> H <sub>14</sub> O <sub>6</sub>    | 289                    | 245                  | 200               | 22                         | Negative |
| ProcyanidinB2             | C <sub>30</sub> H <sub>26</sub> O <sub>12</sub>   | 577                    | 407/125              | 154               | 25/16                      | Negative |
| Kaempferol                | C <sub>15</sub> H <sub>10</sub> O <sub>6</sub>    | 285                    | 185/151              | 171               | 20/25                      | Negative |
| Isorhamnetin              | C <sub>16</sub> H <sub>12</sub> O <sub>7</sub>    | 315                    | 300/151              | 180               | 23/31                      | Negative |
| Hyperoside                | C <sub>21</sub> H <sub>20</sub> O <sub>12</sub>   | 463                    | 300/271              | 200               | 24                         | Negative |
| Quercetin                 | C <sub>15</sub> H <sub>10</sub> O <sub>7</sub>    | 301                    | 179/151              | 125               | 20/22                      | Negative |
| Epicatechin gallate       | C <sub>15</sub> H <sub>14</sub> O <sub>7</sub>    | 441                    | 169/289              | 130               | 24/23                      | Negative |
| Luteolin                  | C <sub>15</sub> H <sub>10</sub> O <sub>6</sub>    | 609                    | 300/271              | 190               | 50                         | Negative |
| Apigenin                  | C <sub>21</sub> H <sub>20</sub> O <sub>10</sub>   | 269                    | 117/151              | 130               | 23/22                      | Negative |
| Myricetin                 | C <sub>15</sub> H <sub>10</sub> O <sub>8</sub>    | 317                    | 210                  | 151               | 25                         | Negative |
| Quercetin 3-O-Glc         | C <sub>21</sub> H <sub>20</sub> O <sub>12</sub>   | 463                    | 301                  | 200               | 24                         | Negative |
| kaempferol glucuronid     | C <sub>21</sub> H <sub>18</sub> O <sub>12</sub>   | 461                    | 285                  | 210               | 28                         | Negative |
| Quercetin glucuronide     | C <sub>21</sub> H <sub>18</sub> O <sub>13</sub>   | 477                    | 301                  | 200               | 24                         | Negative |
| Kaempferol-3-O-glucoside  | C <sub>21</sub> H <sub>20</sub> O <sub>11</sub>   | 446.9                  | 283.8                | 210               | 28                         | Negative |
| Gallic acid               | C <sub>7</sub> H <sub>6</sub> O <sub>5</sub>      | 169                    | 125                  | 86                | 115                        | Negative |
| Syringic acid             | C <sub>9</sub> H <sub>10</sub> O <sub>5</sub>     | 197                    | 182/123              | 80                | 20                         | Negative |
| Vanillic acid             | C <sub>8</sub> H <sub>8</sub> O <sub>4</sub>      | 167                    | 152/108              | 135/80            | 12/16                      | Negative |
| Protocatechuic acid       | C <sub>7</sub> H <sub>6</sub> O <sub>4</sub>      | 152.9                  | 109                  | 100               | 14                         | Negative |
| Caffeic acid              | C <sub>9</sub> H <sub>8</sub> O <sub>4</sub>      | 297.8                  | 268.7                | 160               | 10                         | Negative |
| 4 hydroxybenzoic acid     | C <sub>7</sub> H <sub>6</sub> O <sub>3</sub>      | 137                    | 93/80.1              | 74                | 20285                      | Negative |
| Ferulic acid              | C <sub>10</sub> H <sub>10</sub> O <sub>4</sub>    | 193                    | 178/134              | 88                | 15/34                      | Negative |
| Salicylic acid            | C <sub>7</sub> H <sub>6</sub> O <sub>3</sub>      | 137                    | 93.03                | 100               | 15                         | Negative |
| <i>P</i> -coumaric acid   | C <sub>9</sub> H <sub>8</sub> O <sub>3</sub>      | 162.9                  | 119                  | 135               | 12                         | Negative |
| 3-hydroxybenzoic acid     | C <sub>7</sub> H <sub>6</sub> O <sub>3</sub>      | 137                    | 93.1                 | 74                | 16/8                       | Negative |
| Chlorogenic acid          | C <sub>16</sub> H <sub>18</sub> O <sub>9</sub>    | 353                    | 191                  | 110               | 15                         | Negative |
| Delphinidin-3-O-glucoside | C <sub>21</sub> H <sub>21</sub> O <sub>12</sub> + | 465                    | 303                  | 130               | 13                         | Positive |
| Delphinidin 3,5-diGlc     | C <sub>27</sub> H <sub>31</sub> O <sub>17</sub> + | 627.2                  | 303                  | 130               | 13                         | Positive |

|                                  |                                                   |       |       |     |    |          |
|----------------------------------|---------------------------------------------------|-------|-------|-----|----|----------|
| Cyanidin-3-O-galactoside         | C <sub>21</sub> H <sub>21</sub> O <sub>11</sub> + | 448.9 | 286.8 | 130 | 15 | Positive |
| Cyanidin-3-O-glucoside           | C <sub>21</sub> H <sub>21</sub> O <sub>11</sub> + | 449   | 287   | 130 | 15 | Positive |
| Petunidin-3-O-glucoside          | C <sub>22</sub> H <sub>23</sub> O <sub>12</sub> + | 479   | 317   | 140 | 15 | Positive |
| Malvidin-3-O-glucoside           | C <sub>23</sub> H <sub>25</sub> O <sub>12</sub> + | 493   | 316   | 140 | 14 | Positive |
| Peonidin-3-O-glucoside           | C <sub>22</sub> H <sub>23</sub> O <sub>11</sub> + | 463   | 301   | 130 | 15 | Positive |
| Cyanidin-3-O-xyloside            | C <sub>20</sub> H <sub>19</sub> O <sub>10</sub> + | 419   | 287   | 130 | 15 | Positive |
| Peonidin-3-(5'-rutinoside)-O-glu | C <sub>21</sub> H <sub>21</sub> ClO <sub>11</sub> | 448.9 | 286.8 | 130 | 15 | Positive |

**Table S2.** The relative quantification of differential metabolites in rosa and fermented rosa (n=3). Data are presented as mean  $\pm$  SD)

| Compounds                 | R                     | FR                    | ratio |
|---------------------------|-----------------------|-----------------------|-------|
| <b>Procyanidins</b>       |                       |                       |       |
| Epicatechin               | 101238 $\pm$ 15.9     | 215847 $\pm$ 17.8     | 2.1   |
| Catechin                  | 182217.3 $\pm$ 6.6    | 626108.3 $\pm$ 5.6    | 3.4   |
| ProcyanidinB2             | 899731.0 $\pm$ 5.8    | 632169.3 $\pm$ 6.1    | 0.7   |
| <b>Flavonoids</b>         |                       |                       |       |
| Isorhamnetin              | 206749 $\pm$ 7.8      | 235656 $\pm$ 7.4      | 1.1   |
| Kaempferol                | 3534848.7 $\pm$ 8.3   | 323081 $\pm$ 9.6      | 0.1   |
| Quercetin                 | 3953086.0 $\pm$ 31.4  | 2361286.7 $\pm$ 38.6  | 0.6   |
| Hyperoside                | 39510165.0 $\pm$ 44.6 | 52466530.0 $\pm$ 37.9 | 1.3   |
| Epicatechin gallate       | 2220401.0 $\pm$ 26.9  | 1521394.0 $\pm$ 34.4  | 0.7   |
| Luteolin                  | 1614.3 $\pm$ 3.2      | 1542.3 $\pm$ 2.6      | 1.0   |
| Apigenin                  | 120893.7 $\pm$ 29.4   | 153698.3 $\pm$ 22.6   | 1.3   |
| Myricetin                 | 47734.0 $\pm$ 10.2    | 52124.3 $\pm$ 15.8    | 1.1   |
| Quercetin 3-O-Glc         | 298744.7 $\pm$ 23.9   | 364505.3 $\pm$ 26.8   | 1.2   |
| kaempferol glucuronid     | 39225.7 $\pm$ 14.3    | 50182.3 $\pm$ 16.8    | 1.3   |
| Quercetin glucuronide     | 7690.3 $\pm$ 12.4     | 9632.7 $\pm$ 16.5     | 1.3   |
| Kaempferol-3-O-glucoside  | 7092.0 $\pm$ 7.6      | 13232.7 $\pm$ 16.2    | 1.9   |
| <b>Phenolic acids</b>     |                       |                       |       |
| Gallic acid               | 10670363.3 $\pm$ 37.8 | 23673403.0 $\pm$ 38.4 | 2.2   |
| Protocatechuic acid       | 332158.7 $\pm$ 9.1    | 450311.3 $\pm$ 10.7   | 1.4   |
| Chlorogenic acid          | 41052556 $\pm$ 36.4   | 41058665.0 $\pm$ 44.5 | 1.0   |
| Syringic acid             | 2417968.7 $\pm$ 21.5  | 7212956.7 $\pm$ 19.5  | 3.0   |
| Vanillic acid             | 24576156.7 $\pm$ 36.9 | 30674819.7 $\pm$ 35.6 | 1.2   |
| 4 hydroxybenzoic acid     | 27501.3 $\pm$ 4.1     | 29325.7 $\pm$ 3.2     | 1.1   |
| Caffeic acid              | 282169.3 $\pm$ 7.3    | 314311.3 $\pm$ 6.5    | 1.1   |
| Salicylic acid            | 1426.7 $\pm$ 3.2      | 1268.7 $\pm$ 3.6      | 0.9   |
| Ferulic acid              | 25245.7 $\pm$ 1.8     | 14575.3 $\pm$ 1.9     | 0.6   |
| <i>P</i> -coumaric acid   | 30667.0 $\pm$ 15.9    | 28625.7 $\pm$ 18.5    | 0.9   |
| 3-hydroxybenzoic acid     | 21177.7 $\pm$ 5.3     | 20545.7 $\pm$ 6.7     | 1.0   |
| <b>Anthocyanin</b>        |                       |                       |       |
| Delphinidin-3-O-glucoside | 1580369.3 $\pm$ 26.7  | 1592733.3 $\pm$ 28.8  | 1.0   |

|                                  |                |               |     |
|----------------------------------|----------------|---------------|-----|
| Delphinidin 3,5-diGlc            | 5170716.3±35.6 | 5367658±38.2  | 1.0 |
| Cyanidin-3-O-galactoside         | 425153.3±18.4  | 446329±14.9   | 1.0 |
| Cyanidin-3-O-glucoside           | 70871541±32.3  | 43843708±33.9 | 0.6 |
| Cyanidin-3-O-xyloside            | 306645±16.3    | 370780.7±15.2 | 1.2 |
| Petunidin-3-O-glucoside          | 616645±16.5    | 638227.3±34.1 | 1.0 |
| Malvidin-3-O-glucoside           | 1129±6.1       | 1150.7±7.6    | 1.0 |
| Peonidin-3-O-glucoside           | 31177.3±15.2   | 22282±14.5    | 0.7 |
| Peonidin-3-(5'-rutinoside)-O-glu | 272915.7±16.7  | 267162±24.9   | 0.8 |

**Table S3.** The relative quantification of intermediate in microbial metabolite (n=3. Data are presented as mean ± SD)

| Compounds                                         | R             | FR             |
|---------------------------------------------------|---------------|----------------|
| Cyanidin                                          | 1966.7 ± 10.3 | 1900.0± 9.3    |
| Penidin                                           | 766.67 ± 17.0 | 1733.33 ± 16.8 |
| Eriodictyol chalcone                              | 336.7 ± 13.0  | 666.7 ± 12.6   |
| 5-[(3,4-dihydroxyphenyl) methyl] oxolan-2-one     | 1000.0 ± 21.3 | 733.3±29.7     |
| 5-(3',4',5'-Trihydroxyphenyl)-gamma-valerolactone | 1233.3 ± 24.0 | 2033.3 ± 24.2  |
| 5-(3,4-dihydroxyphenyl) pentanoic acid            | 1866.7 ± 19.7 | 2733.33 ± 13.4 |
| Dihydrocaffeic acid                               | 4950.2 ± 27.3 | 5670.1 ±20.9   |
| 3,4-Dihydroxyphenylacetic acid                    | 8466.7 ±26.1  | 15533.3 ± 39.8 |

**Table S4.** Computed global chemical reactivity descriptors (eV) of the studied C3G, PB2, CATE, GA, PA (water).

| Properties (eV)                 | C3G     | PB2     | CATE    | GA      | PA      |
|---------------------------------|---------|---------|---------|---------|---------|
| LUMO                            | -2.9326 | -0.0680 | 0.0098  | -1.1851 | -1.1687 |
| HOMO                            | -5.9095 | -5.6472 | -5.7305 | -5.9724 | -6.0072 |
| $\Delta E_{\text{(LUMO-HOMO)}}$ | 2.9769  | 5.5792  | 5.7403  | 4.7873  | 4.8385  |
| Ionization potential            | 5.9095  | 5.6472  | -0.0098 | 5.9724  | 6.0072  |
| Electron affinity               | 2.9326  | 0.0680  | 5.7403  | 1.1851  | 1.1687  |
| Chemical potential              | -4.4211 | -2.8576 | -2.8603 | -3.5787 | -3.5880 |
| Electronegativity               | 4.4211  | 2.8576  | 2.8603  | 3.5787  | 3.5880  |
| Electrophilicity                | 6.5657  | 1.4637  | 1.4253  | 2.6753  | 2.6607  |
| Chemical hardness               | 1.4885  | 2.7896  | 2.8701  | 2.3937  | 2.4192  |
| Chemical softness               | 0.3359  | 0.1792  | 0.1742  | 0.2089  | 0.2067  |

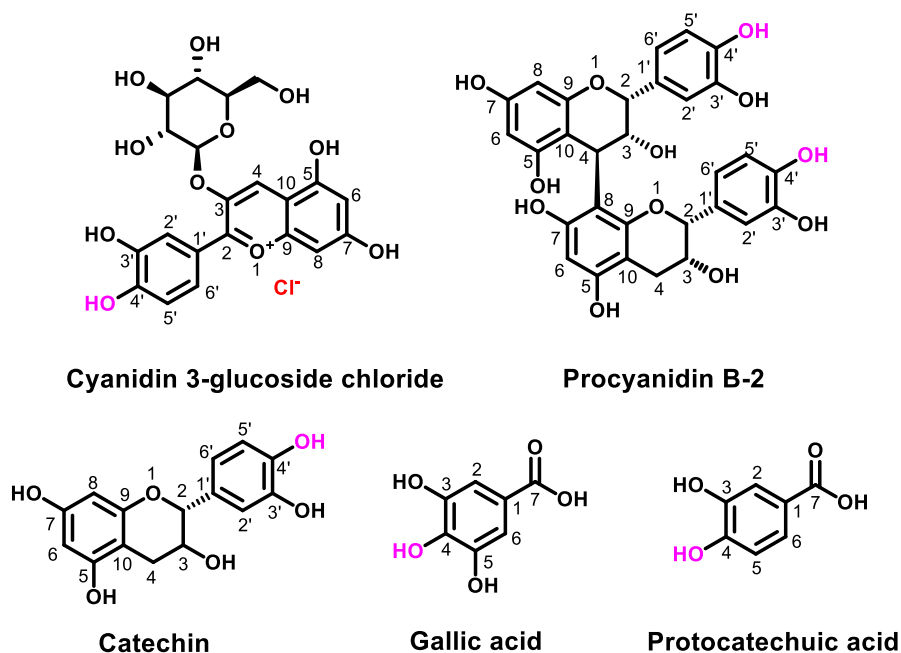

**Figure. S1.** Molecular structure of the main phenolic compounds

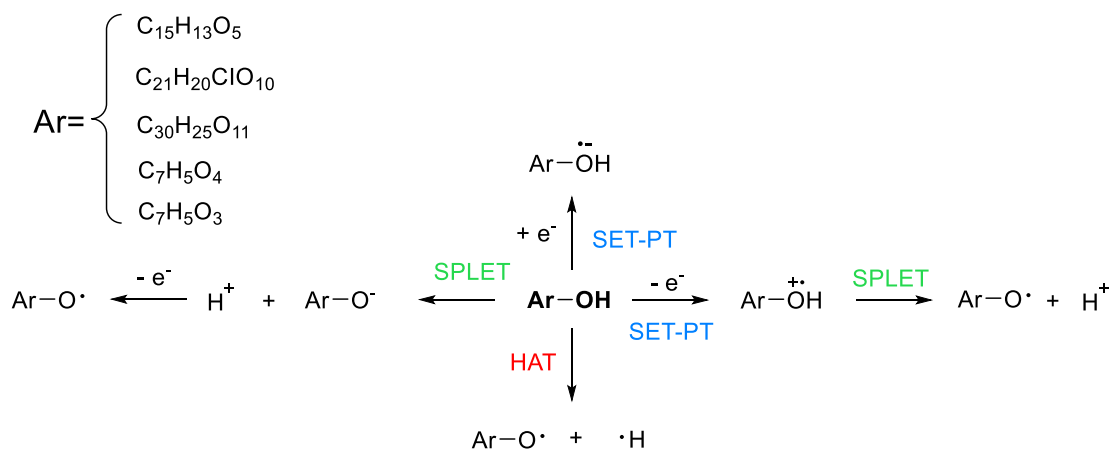

**Fig. S2.** Probable routes associated with different antioxidant mechanisms

The relevant equation of the mechanisms as listed:

1. HAT:

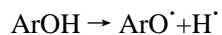

$$\text{BDE} = H(\text{ArO}^\bullet) + H(\text{H}^\bullet) - H(\text{ArOH})$$

2. SET

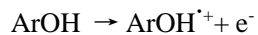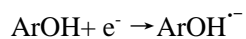

$$\text{IP} = H(\text{ArOH}^{\bullet+}) + H(\text{e}^-) - H(\text{ArOH})$$

$$\text{EA} = H(\text{ArOH}^{\bullet-}) - H(\text{e}^-) - H(\text{ArOH})$$

3. SET-PT

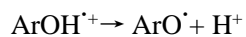

$$\text{PDE} = H(\text{ArOH}^\bullet) + H(\text{H}^+) - H(\text{ArOH}^{\bullet+})$$

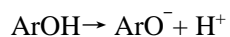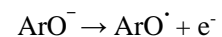

$$\text{PA1} = H(\text{ArO}^-) + H(\text{H}^\bullet) - H(\text{ArOH})$$

$$\text{ETE} = H(\text{ArO}^\bullet) + H(\text{e}^-) - H(\text{ArO}^-)$$
